# Supplementary material for: Socioeconomic Status, Lifestyle, and DNA Methylation Age Among Racially and Ethnically Diverse Adults: NIMHD Social Epigenomics Program
Source: PubMed Central journal article supplement (PMC11287425; doi:10.1001/jamanetworkopen.2024.21889), 2024-07-29
Supplement: jamanetwopen-e2421889-s002.pdf [file jamanetwopen-e2421889-s002.pdf]

## Data Sharing Statement

Maunakea. Socioeconomic Status, Lifestyle, and DNA Methylation Age Among Racially and Ethnically Diverse Adults. *JAMA Netw Open*. Published July 29, 2024.

doi:10.1001/jamanetworkopen.2024.21889

### Data

**Data available:** Yes

**Data types:** Deidentified participant data

**How to access data:** All data used for this study are available de-identified upon reasonable request made to the MEC Research Committee at: <https://uhcancercenter.org/for-researchers/mec-data-sharing>. The datasets used in this study are available in the National Center for Biotechnology Information (NCBI) website's Gene Expression Omnibus (GEO) at <https://www.ncbi.nlm.nih.gov/geo/browse/> corresponding to the following GEO Accession number: GSE270223

**When available:** With publication

### Supporting Documents

**Document types:** None

### Additional Information

**Who can access the data:** Researchers whose proposed use of the data has been approved

**Types of analyses:** For any purpose

**Mechanisms of data availability:** With a signed data access agreement
